# Supplementary material for: Genome Sequencing as a Diagnostic Test in Children With Unexplained Medical Complexity
Source: PubMed Central journal article supplement (PMC7509619; doi:10.1001/jamanetworkopen.2020.18109), 2020-09-22
Supplement: jamanetwopen-e2018109-s001.pdf [file jamanetwopen-e2018109-s001.pdf]

## Supplementary Online Content

Costain G, Walker S, Marano M, et al. Genome sequencing as a diagnostic test in children with unexplained medical complexity. *JAMA Netw Open*. 2020;3(9):e2018109. doi:10.1001/jamanetworkopen.2020.18109

**eFigure 1.** Total Count of HPO Terms for the Proband Cohort (n=49), by Phenotype Category

**eFigure 2.** Total Number of Probands With at Least One HPO Term in a Phenotype Category

**eFigure 3.** Total Count of Clinical Genetic Tests in Each Category Performed in the Proband Cohort (n=49)

**eFigure 4.** Total Number of Probands With at Least One Test in a Clinical Genetic Test Category

**eFigure 5.** Mean Depth of Coverage of the Genome Sequencing Data

**eFigure 6.** Median Count of Features by HPO Category in the Diagnosed and Undiagnosed Subgroups

**eTable 1.** Individuals With Suspected or Partial Primary Diagnoses Known at the Time of Study Recruitment

**eTable 2.** Demographic and Clinical Features in the Proband Study Cohort

**eTable 3.** Selected Variants of Uncertain Diagnostic Significance Identified in the Proband Study Cohort

This supplementary material has been provided by the authors to give readers additional information about their work.

**eFigure 1.** Total Count of HPO Terms for the Proband Cohort (n=49), by Phenotype Category

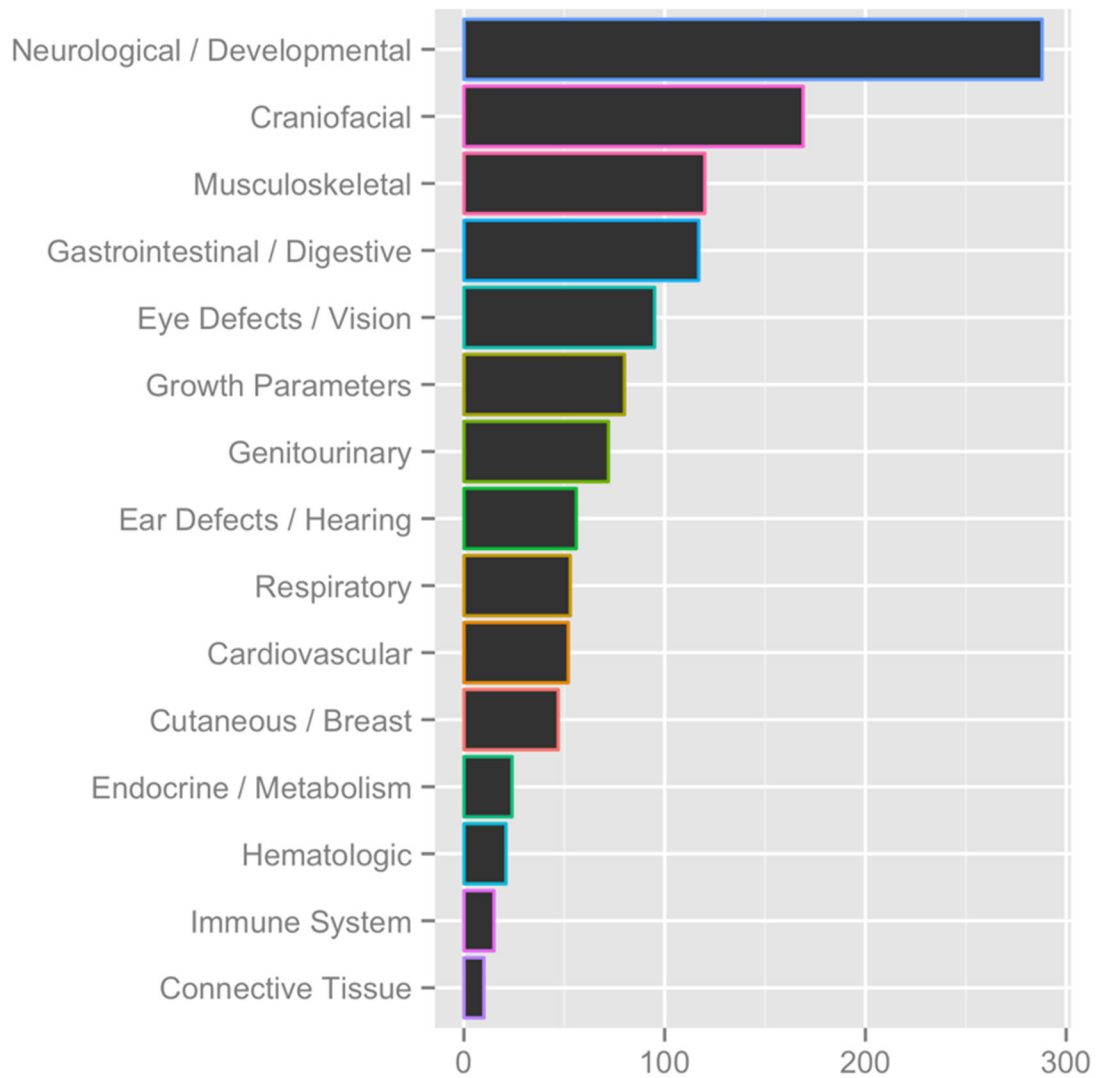

**eFigure 2.** Total Number of Probands With at Least One HPO Term in a Phenotype Category

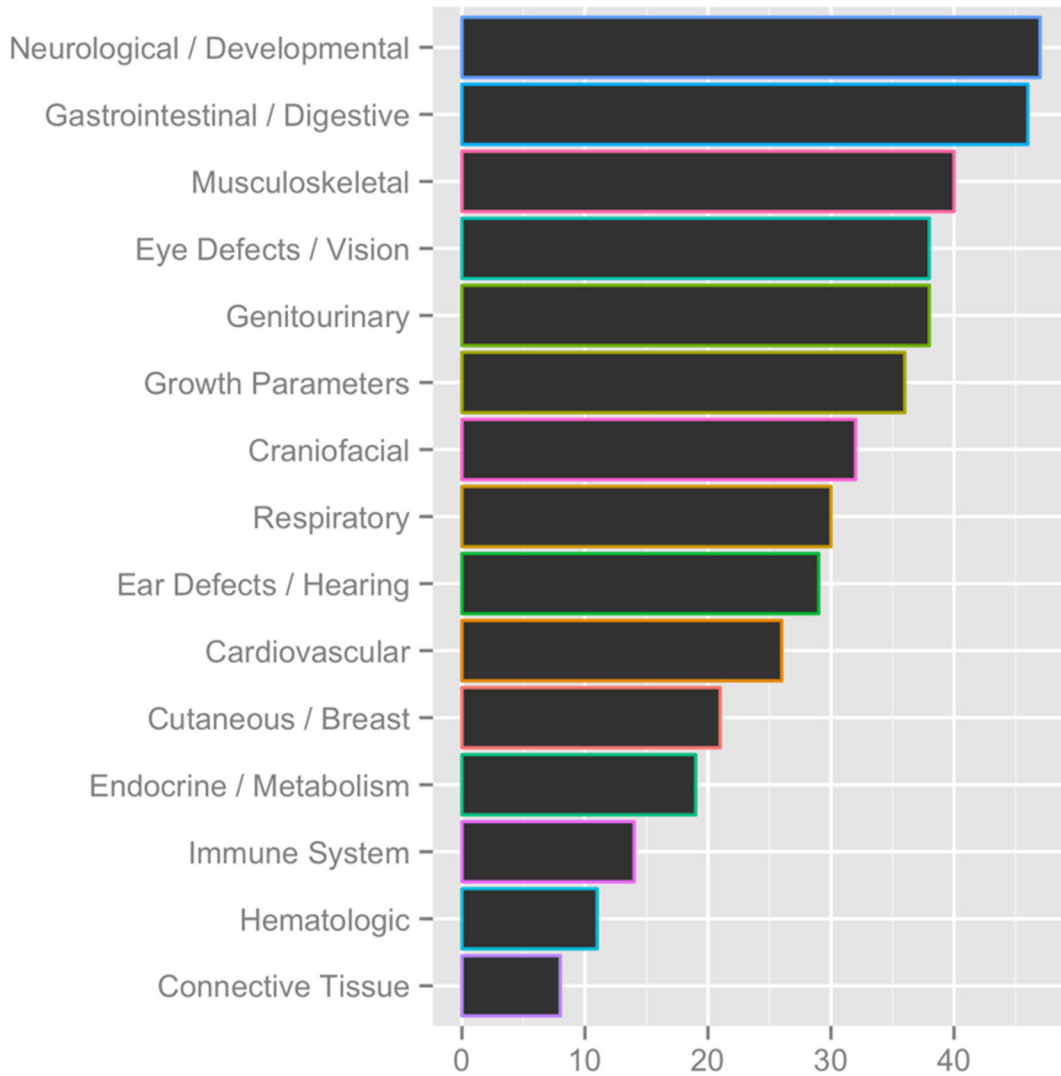

**eFigure 3.** Total Count of Clinical Genetic Tests in Each Category Performed in the Proband Cohort (n=49)

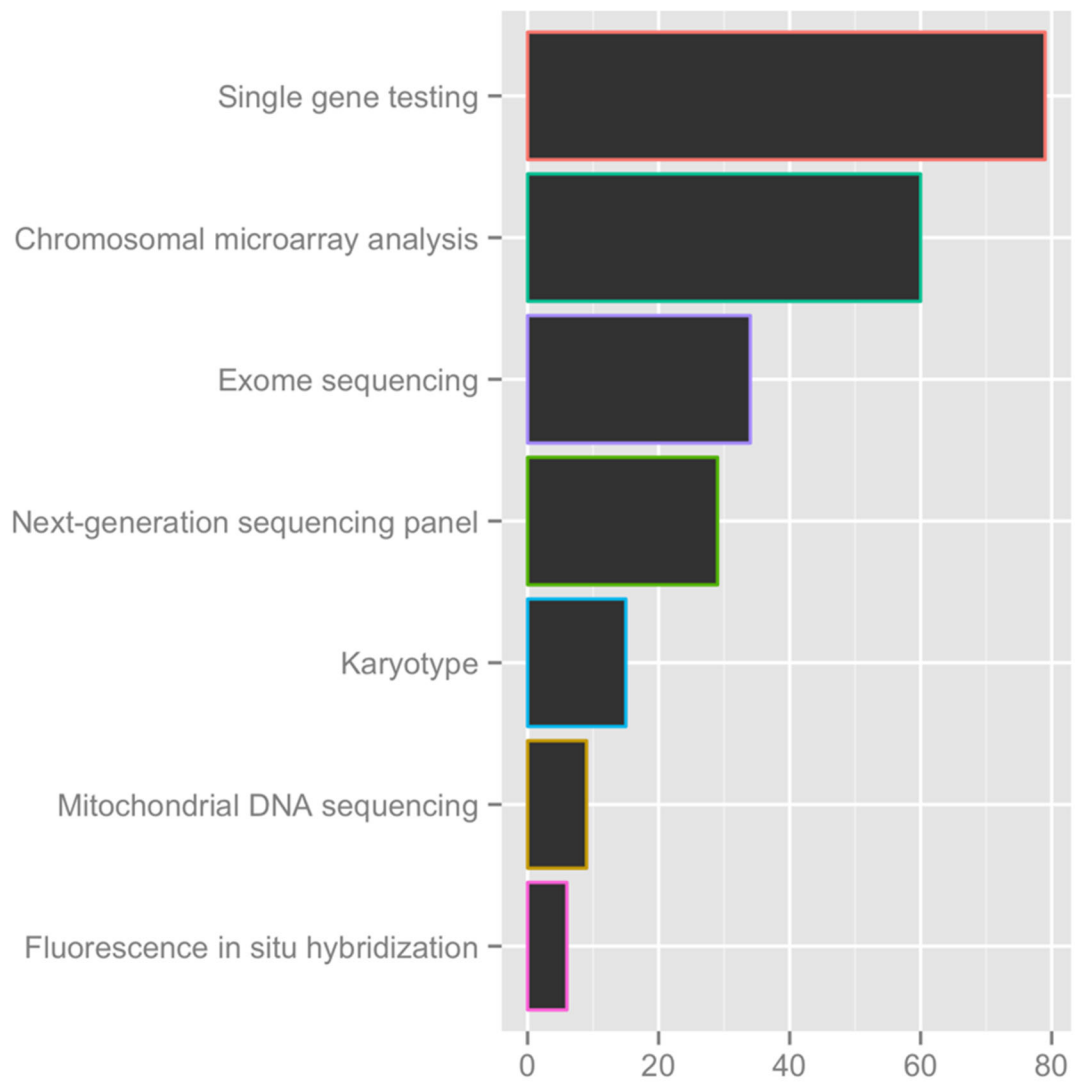

**eFigure 4.** Total Number of Probands With at Least One Test in a Clinical Genetic Test Category

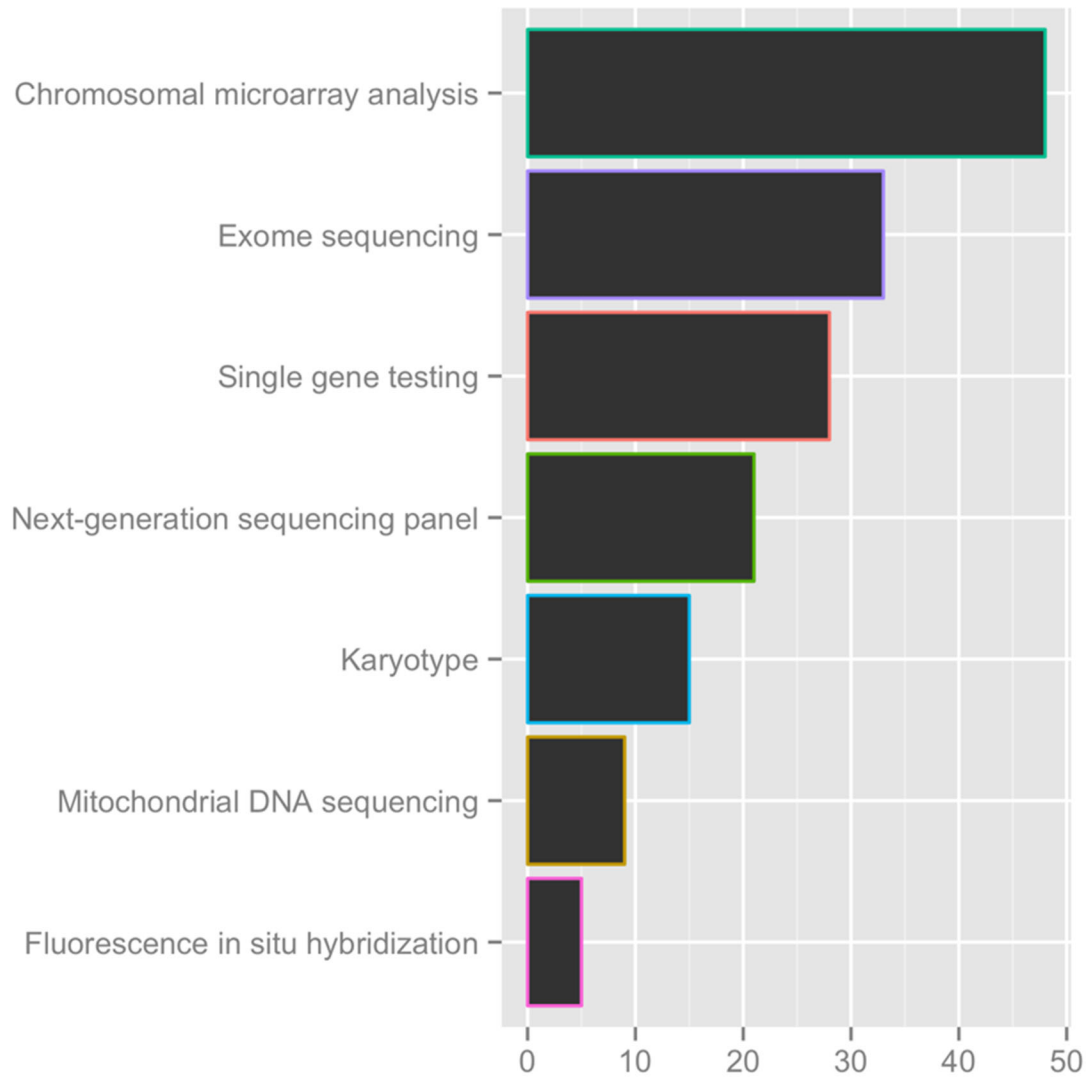

**eFigure 5.** Mean Depth of Coverage of the Genome Sequencing Data

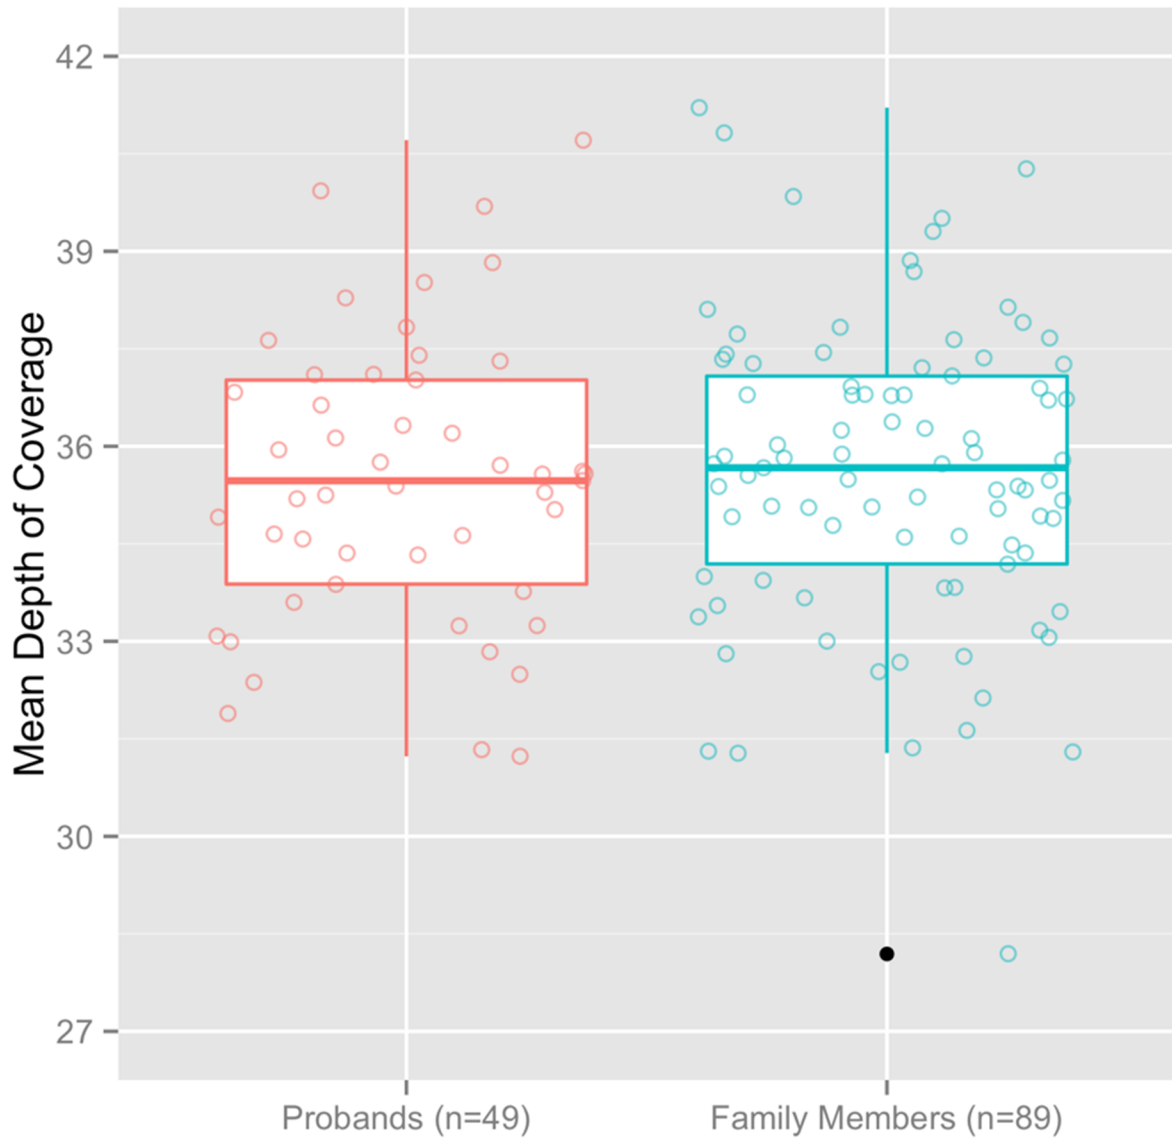

**eFigure 6.** Median Count of Features by HPO Category<sup>a</sup> in the Diagnosed and Undiagnosed Subgroups

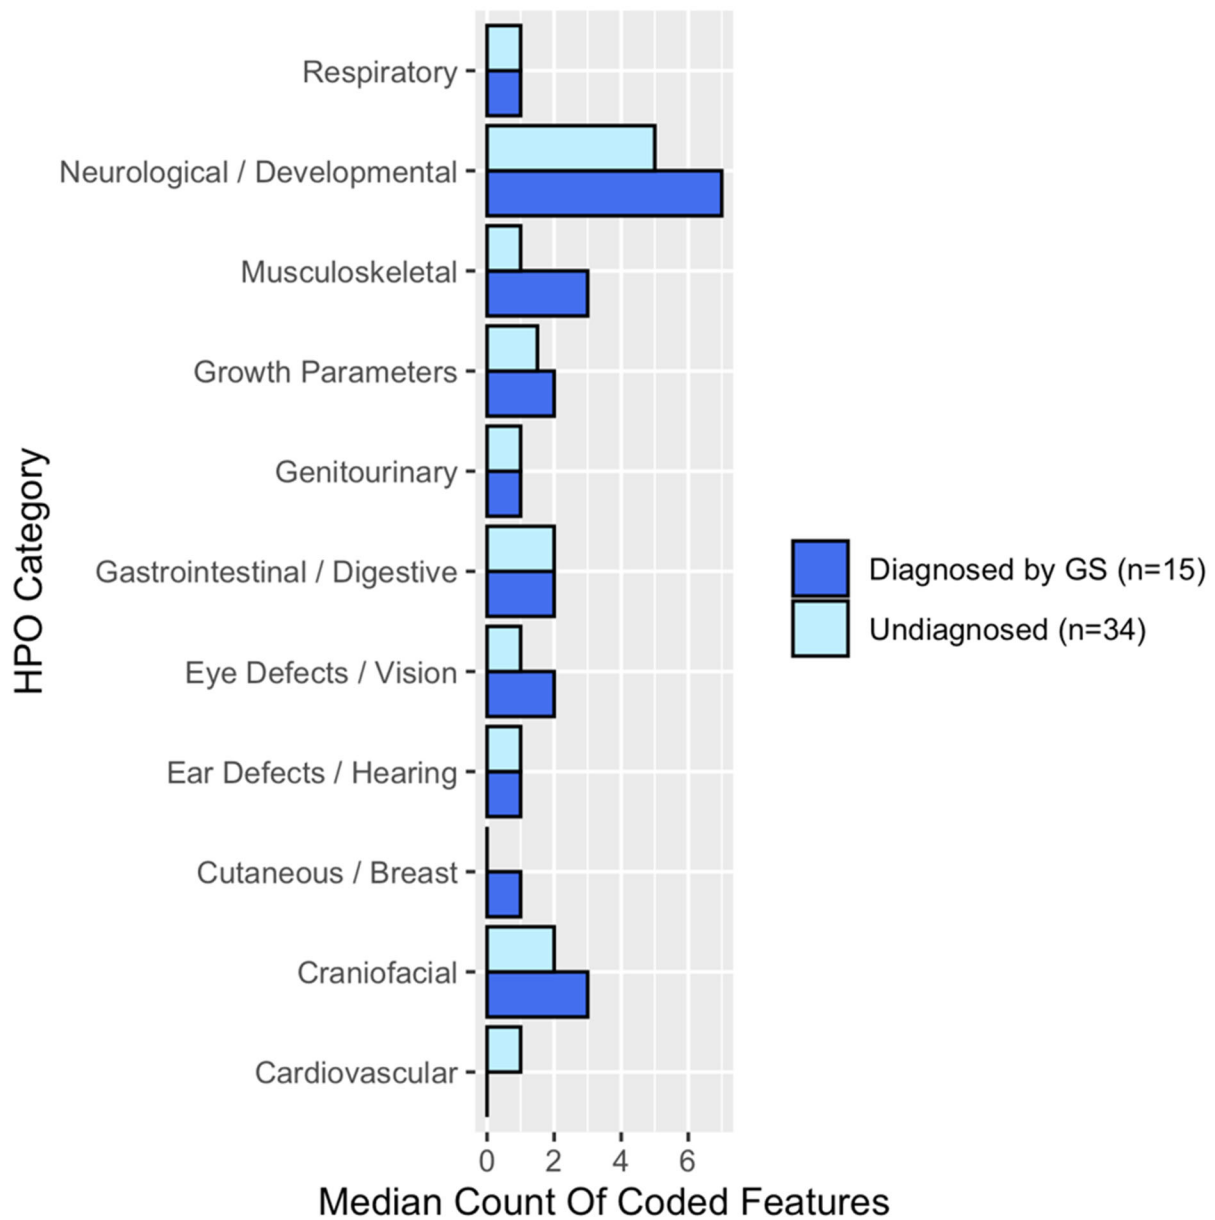

<sup>a</sup>The categories “Hematologic”, “Immune System”, “Connective Tissue”, and “Endocrine / Metabolism” are not displayed because the median count was 0 in both subgroups.

**eTable 1.** Individuals With Suspected or Partial Primary Diagnoses Known at the Time of Study Recruitment

| <i>Study ID</i> | <i>Sex</i> | <i>Gene</i>    | <i>Condition<br/>(MIM # Phenotype)</i>                                                         | <i>IP</i> | <i>Variant Details<br/>(Zygosity) [Transcript]</i> | <i>Origin</i> | <i>Reasons for further<br/>genetic testing</i>                                     |
|-----------------|------------|----------------|------------------------------------------------------------------------------------------------|-----------|----------------------------------------------------|---------------|------------------------------------------------------------------------------------|
| CMC 02          | M          | -              | Down syndrome<br>(190685)                                                                      | -         | 47,XY,+21                                          | dn            | Severity of developmental<br>delays, seizure disorder,<br>and feeding difficulties |
| CMC 23          | F          | <i>HNF4A</i>   | Fanconi renotubular<br>syndrome 4, with<br>maturity-onset<br>diabetes of the young<br>(616026) | AD        | c.187C>T / p.(R63W)<br>(het) [NM_175914]           | pat           | Multiple major congenital<br>anomalies                                             |
| CMC 32          | M          | <i>SOX5</i>    | Lamb-Shaffer<br>syndrome (616803)                                                              | AD        | c.928T>A / p.(C310S)<br>(het) (NM_006940)          | dn            | Type I transferrin isoform<br>profile, and variant not<br>classified as pathogenic |
| CMC 43          | M          | <i>KRAS</i>    | Noonan syndrome 3<br>(609942)                                                                  | AD        | c.40G>A / p.(V14I)<br>(het) [NM_004985]            | dn            | Treatment-resistant<br>hyperkinetic movement<br>disorder                           |
| CMC 46          | M          | <i>ATP6AP2</i> | Mental retardation,<br>X-linked, syndromic,<br>Hedera type (300423)                            | XL        | c.301-11_301-10delTT / p.(?)<br>(hem) [NM_005765]  | dn            | Inflammatory bowel<br>disease, and variant not<br>classified as pathogenic         |
| CMC 49          | M          | <i>EDA</i>     | Ectodermal dysplasia<br>1, hypohidrotic, X-<br>linked (305100)                                 | XL        | c.458G>A / p.(R153H)<br>(hem) [NM_001005612]       | mat           | Multiple major congenital<br>anomalies                                             |

AD, autosomal dominant; dn, *de novo*; F, female; hem, hemizygous; het, heterozygous; IP, inheritance pattern; M, male; mat, maternal; MIM, Mendelian Inheritance in Man® ([www.omim.org](http://www.omim.org)); pat, paternal; XL, X-linked



**eTable 2.** Demographic and Clinical Features in the Proband Study Cohort

|                                      | <b>Total<br/>(n=49)</b> |            | <b>Diagnosed by GS<br/>(n=15)</b> |            | <b>No diagnosis by GS<br/>(n=34)</b> |            | <b>p-value<sup>a</sup></b> |
|--------------------------------------|-------------------------|------------|-----------------------------------|------------|--------------------------------------|------------|----------------------------|
|                                      | Number                  | (%)        | Number                            | (%)        | Number                               | (%)        |                            |
| Male sex                             | 29                      | (59.1)     | 7                                 | (46.6)     | 22                                   | (64.7)     | ns                         |
| Clinical ES                          | 33                      | (67.3)     | 9                                 | (60.0)     | 24                                   | (70.5)     | ns                         |
| Positive family history <sup>b</sup> | 6                       | (12.2)     | 3                                 | (20.0)     | 3                                    | (8.8)      | ns                         |
| Parental consanguinity               | 5                       | (10.2)     | 2                                 | (13.3)     | 3                                    | (8.8)      | ns                         |
| European/Caucasian ethnicity         | 26                      | (53.0)     | 8                                 | (53.3)     | 18                                   | (52.9)     | ns                         |
|                                      | Median                  | (range)    | Median                            | (range)    | Median                               | (range)    |                            |
| Age in years                         | 6.9                     | (0.6-17.8) | 8                                 | (4.5-17.8) | 4.9                                  | (0.6-13.2) | 0.003                      |
| Coded HPO terms <sup>c</sup>         | 24                      | (6-58)     | 26                                | (11-45)    | 23                                   | (6-58)     | ns                         |

ES, exome sequencing; GS, genome sequencing; HPO, Human Phenotype Ontology; ns, not significant (p>0.05)

<sup>a</sup>Fisher's exact test for comparison of proportions, and Kruskal–Wallis test for comparison of medians.

<sup>b</sup>First-degree relative with at least partial phenotypic overlap

<sup>c</sup>See text for details.

**eTable 3.** Selected Variants of Uncertain Diagnostic Significance Identified in the Proband Study Cohort

| <i>Study ID</i>                                                  | <i>Sex</i> | <i>Selected Features</i>                              | <i>Gene</i>     | <i>Variant Details (Zygosity) [Transcript]</i>       | <i>Origin</i>    |
|------------------------------------------------------------------|------------|-------------------------------------------------------|-----------------|------------------------------------------------------|------------------|
| <b><i>Known disease genes</i></b>                                |            |                                                       |                 |                                                      |                  |
| CMC 01                                                           | F          | Congenital microcephaly, GDD/ID, seizures             | <i>MED23</i>    | c.3957+5G>A (hom) [NM_015979]                        | mat/pat          |
| CMC 03                                                           | F          | SMMCI                                                 | <i>CDON</i>     | c.2674G>A / p.(G892S) (het) [NM_016952]              | mat <sup>a</sup> |
| CMC 04                                                           | M          | GDD/ID, seizures, hypotonia, structural CNS anomalies | <i>PLCB1</i>    | c.246+197G>A (hom) [NM_015192]                       | mat/pat          |
| CMC 07                                                           | F          | GDD, hypotonia, structural CNS anomalies              | <i>KIF1A</i>    | c.4566-66C>T (het) [NM_004321]                       | dn               |
| CMC 28                                                           | M          | GDD/ID, seizures, microcephaly, congenital anomalies  | <i>THOC2</i>    | c.623A>G / p.(N208S) (hem) [NM_001081550]            | mat              |
| CMC 29                                                           | M          | GDD, congenital heart disease                         | <i>CTBP1</i>    | c.107G>A / p.(R36Q) (het) [NM_001328] <sup>b</sup>   | dn               |
| CMC 31                                                           | M          | Intracranial hemorrhage, congenital cataracts         | <i>JAM3</i>     | c.410-1G>A (het) [NM_032801]                         | mat              |
|                                                                  |            |                                                       |                 | c.256+1260G>C (het) [NM_032801]                      | pat              |
| CMC 37                                                           | M          | Potter sequence, GDD                                  | <i>POLA1</i>    | c.3835T>G / p.(F1279V) (hem) [NM_016937]             | mat              |
| CMC 50                                                           | F          | GDD, MCA                                              | <i>TLK2</i>     | c.532-1571_831+4del (het) [NM_006852] <sup>c</sup>   | uk <sup>d</sup>  |
| <b><i>Genes not yet associated with a Mendelian disorder</i></b> |            |                                                       |                 |                                                      |                  |
| CMC 04                                                           | M          | GDD/ID, seizures, structural CNS anomalies            | <i>MAGEE1</i>   | c.877_984del / p.(293_328del) (hem) [NM_020932]      | dn               |
| CMC 18                                                           | F          | GDD, MCA, nystagmus                                   | <i>SF3B3</i>    | c.2012A>G / p.(N671S) (het) [NM_012426]              | dn               |
| CMC 26                                                           | M          | Severe achalasia                                      | <i>ANKRD13B</i> | c.1761C>G / p.(D587E) (het) [NM_152345]              | dn <sup>e</sup>  |
| CMC 32                                                           | M          | Seizures, GDD, hypotonia, sensorineural hearing loss  | <i>DHRX</i>     | c.643C>T / p.(L215F) (het <sup>f</sup> ) [NM_145177] | mat <sup>e</sup> |

|        |   |                                              |                |                                                         |                  |
|--------|---|----------------------------------------------|----------------|---------------------------------------------------------|------------------|
|        |   |                                              | <i>DHRSY</i>   | c.541G>T / p.(V181F)<br>(het <sup>f</sup> ) [NM_145177] | pat <sup>e</sup> |
| CMC 33 | M | Arthrogryposis, hypotonia                    | <i>CAPRINI</i> | c.1338A>T / p.(Q446H)<br>(het) [NM_005898]              | dn               |
| CMC 34 | M | Neurodegenerative disorder, aplastic anemia  | <i>KLHL12</i>  | c.1700A>T / p.(D567V)<br>(het) [NM_001303051]           | dn               |
| CMC 41 | M | Congenital right cerebral hypoplasia, GDD/ID | <i>PLXNC1</i>  | c.1400C>A / p.(A467D)<br>(het) [NM_005761]              | dn               |

CNS, central nervous system; dn, *de novo*; F, female; GDD, global developmental delay; hem, hemizygous; het, heterozygous; hom, homozygous; ID, intellectual disability; M, male; mat, maternal; MCA, multiple congenital anomalies; pat, paternal; SMMCI, solitary median maxillary central incisor syndrome; uk, unknown

<sup>a</sup>Mother does not have features of SMMCI on exam. We questioned whether there could be a gene–environment interaction with another risk factor present in this family (maternal type 1 diabetes mellitus).

<sup>b</sup>ClinVar Accession Number: VCV000426724.2 (same patient).

<sup>c</sup>chr17:60628092\_60637491del

<sup>d</sup>Not inherited from mother.

<sup>e</sup>Variant also present in similarly affected brother.

<sup>f</sup>Gene is within the pseudoautosomal region.
